# Supplementary material for: Synthesis and Application of Scaffolds of Chitosan-Graphene Oxide by the Freeze-Drying Method for Tissue Regeneration
Source: PubMed Central journal article supplement (PMC6222393; doi:10.3390/molecules23102651), 2018-10-16
Supplement: molecules-23-02651-s001.pdf [file molecules-23-02651-s001.pdf]

1 Article

# 2 Synthesis and application of scaffolds of 3 Chitosan-Graphene oxide by the Freeze-drying 4 method for tissue regeneration

5 Cesar Valencia <sup>1</sup>, Carlos H. Valencia<sup>2</sup>, Fabio Zuluaga<sup>1</sup>, Mayra E. Valencia<sup>3</sup>, José H. Mina<sup>3</sup>, and  
6 Carlos David Grande-Tovar<sup>4\*</sup>

7 <sup>1</sup> Laboratorio SIMERQO polímeros, Departamento de Química, Universidad del Valle, Calle 13 # 100-00, Cali,  
8 Colombia

9 <sup>2</sup> Escuela de Odontología, Grupo biomateriales dentales, Universidad del Valle, Calle 13 # 100-00, Cali,  
10 Colombia

11 <sup>3</sup> Grupo de Materiales Compuestos, Escuela de Ingeniería de Materiales, Universidad del Valle, Calle 13 #  
12 100-00, Cali, Colombia

13 <sup>4</sup> Grupo de Investigación de Fotoquímica y Fotobiología, Universidad del Atlántico, Carrera 30 Número 8-49  
14 Puerto Colombia, Colombia

15 \* Corresponding author: carlosgrande@mail.uniatlantico.edu.co

16 Received: date; Accepted: date; Published: date

## 17 1. Experimental

### 18 1.1. Deacetylation degree and characterization of CS by potentiometric method

19 For the DD calculation, a potentiometric titration of CS with a WTW pHmeter pH 3310 was  
20 performed, a NaOH solution of 0.101 M previously standardized with C<sub>8</sub>H<sub>5</sub>KO<sub>4</sub> as titrating agent  
21 was used and a solution of 0.253 g of CS in 20 ml HCl 0.3M.

### 22 1.2. Capillary viscosimetry for the calculation of the M<sub>v</sub>.

23 A standard solution of 100 mL of CH<sub>3</sub>COOH 0.1 M, NaCl 0.2 M and 0.02 g/mL of CS was prepared  
24 for the calculation of the M<sub>v</sub> of CS. From this 5 solutions of 25 mL were prepared with the  
25 concentrations shown in figure 3 and the density was measured with a pycnometer of 1 mL and the  
26 fall time with a viscometer of ubbelohde viscometer with constant β of 3.31x10<sup>-5</sup> that is calculated  
27 with the time of fall of the water.

## 28 1. Supporting tables

29 **Table S1.** Concentrations and drop times of solutions taken in an ubbelohde viscometer.

| Concentration (mL/g) | Time (s) | ρ (g/mL) |
|----------------------|----------|----------|
| Solvent              | 277      | 1.0320   |
| 0.0008               | 279      | 1.0324   |
| 0.0010               | 282      | 1.0327   |
| 0.0013               | 283      | 1.0332   |
| 0.0015               | 284      | 1.0348   |
| 0,0018               | 285      | 1.0360   |
| 0.0020               | 286      | 1.0368   |

## 30 2. Supporting images

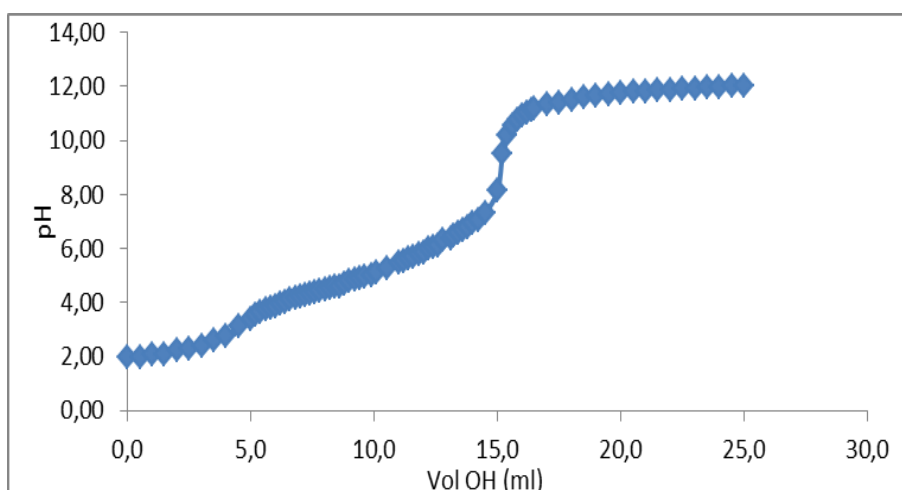

31 **Figure S1.** Potentiometric titration of the CS.

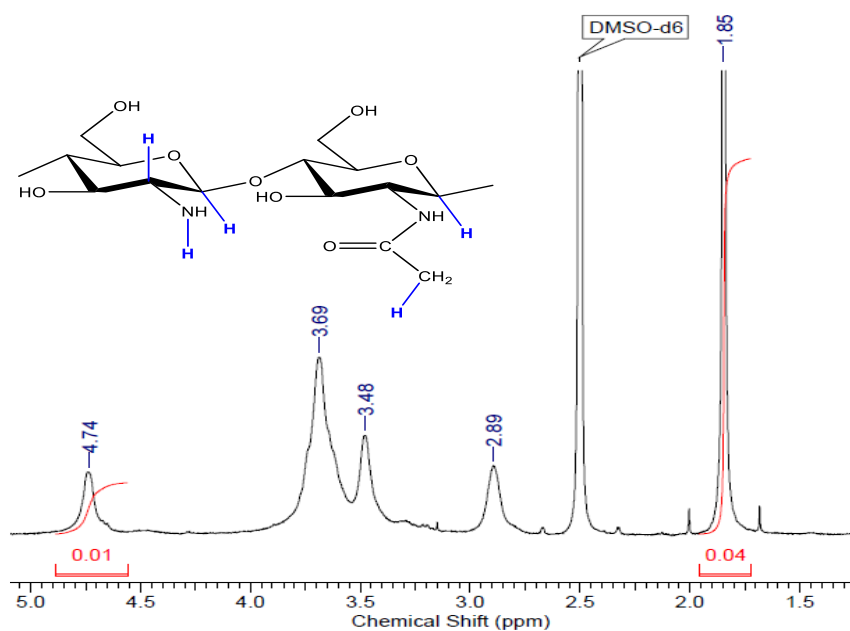

32 **Figure S2.**  $^1\text{H-NMR}$  of the CS.

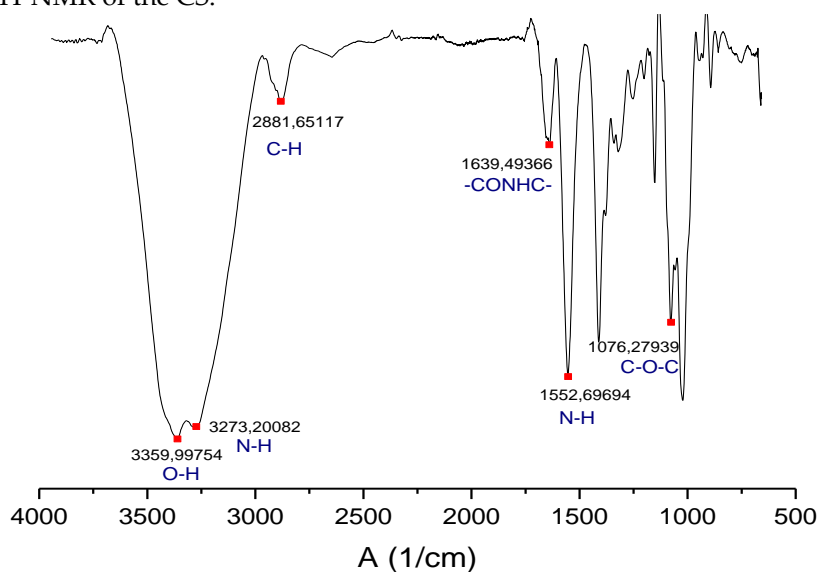

33 **Figure S3.** FTIR of the CS.

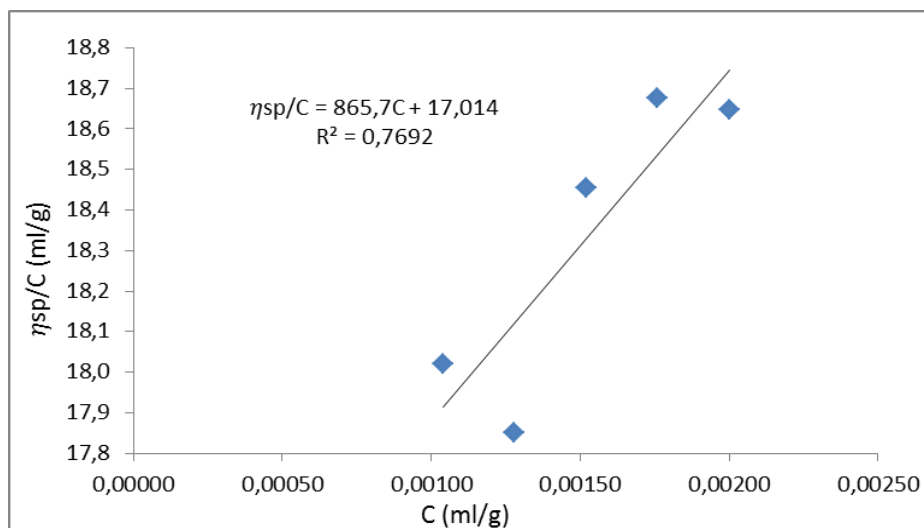

34 **Figure S4.** Viscosity curve. Specific viscosity vs concentration.

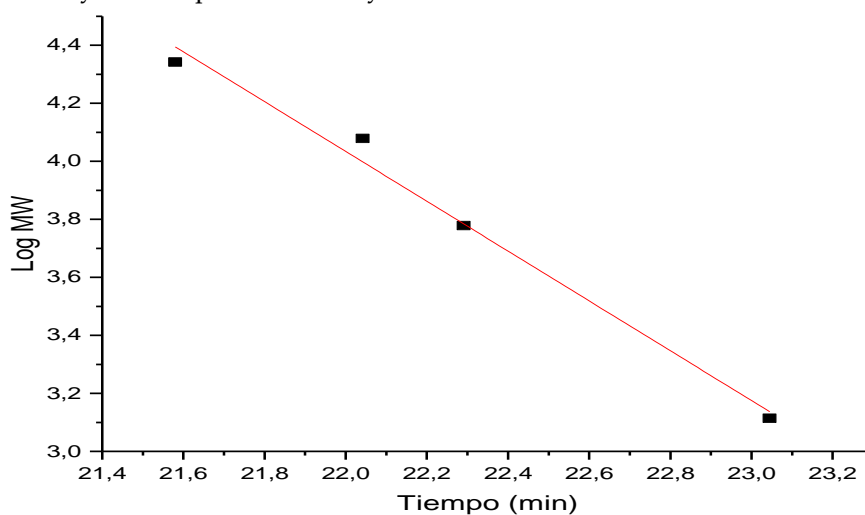

35 **Figure S5.** Calibration curve of GPC with pululan standards.

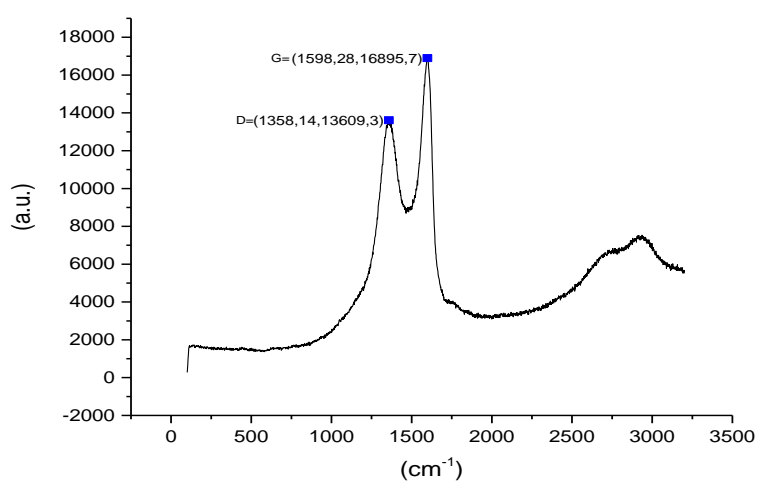

36 **Figure S6.** Raman spectrum of the GO

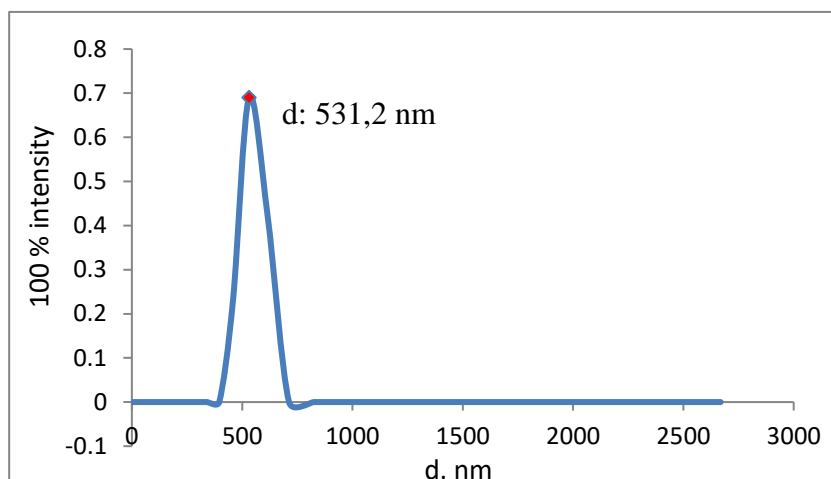

37 Figure S7. DLS of the GO

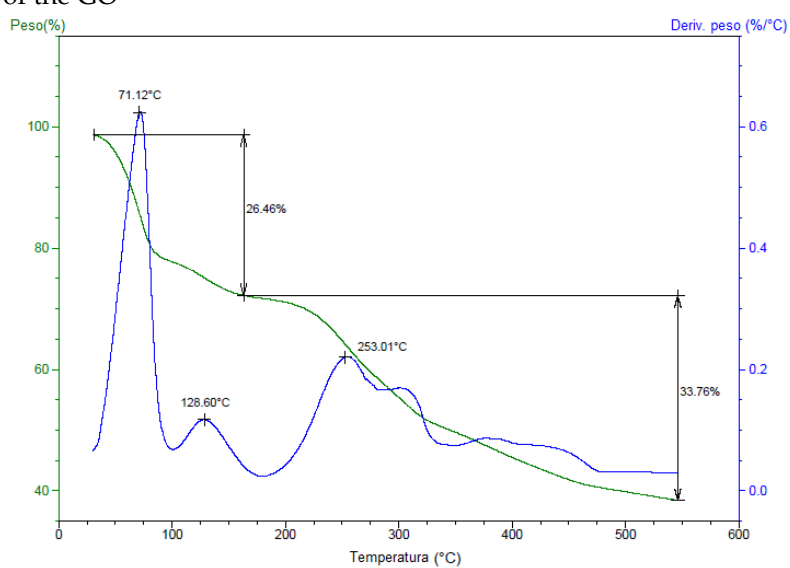

(a)

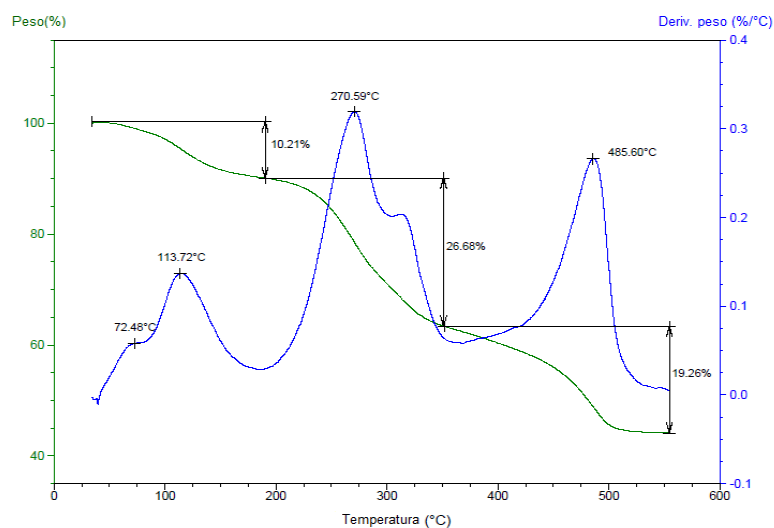

(b)

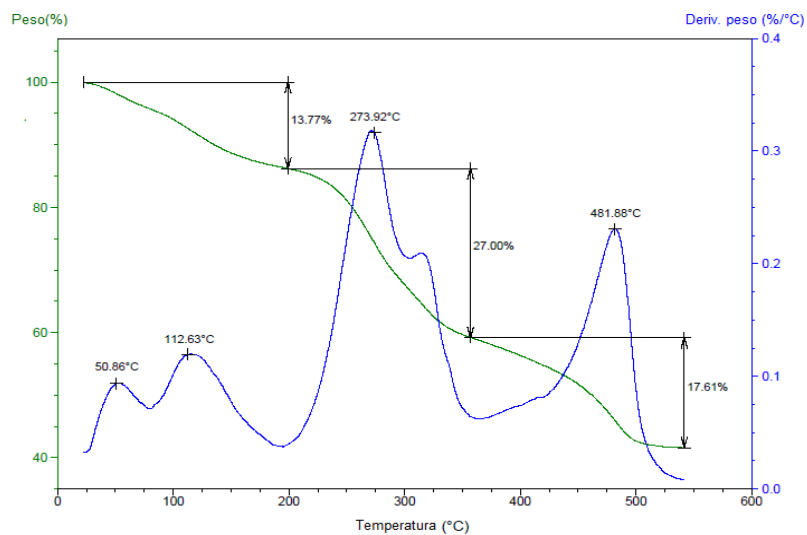

(c)

38 **Figure S8.** Thermogravimetric curve of CS scaffolds (a) without GO, (b) with 0.5% GO and (c) with  
39 1.0% GO.

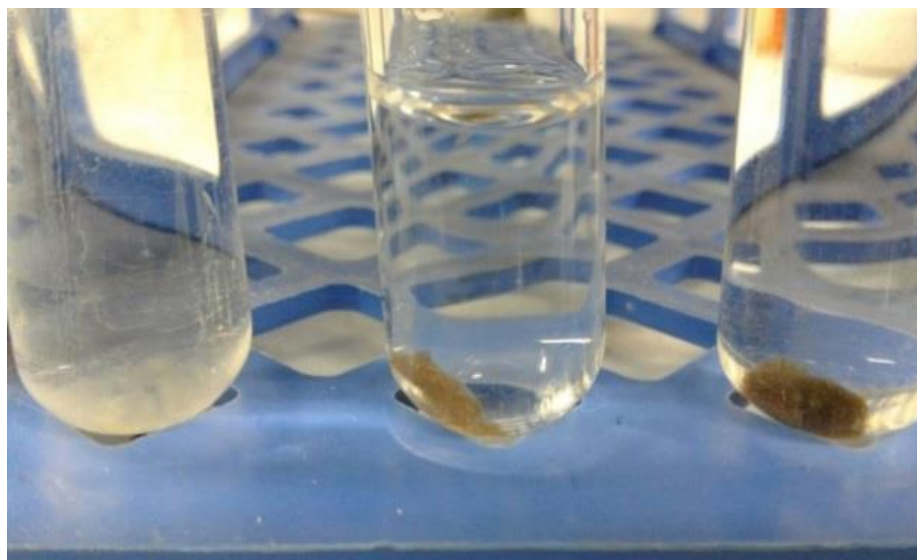

(a)

(b)

(c)

40 **Figure S9.** Degradability test of CS scaffolds in physiological serum (a) without GO, (b) with 0.5%  
41 GO and (c) with 1.0% GO added.
